# Supplementary material for: Comparison of Sorafenib versus Hepatic Arterial Infusion Chemotherapy-Based Treatment for Advanced Hepatocellular Carcinoma with Portal Vein Tumor Thrombosis
Source: PubMed Central journal article supplement — Gut Liver. 2020 Apr 22;15(2):284–94. doi: 10.5009/gnl19367 (PMC7960975; doi:10.5009/gnl19367), 2020-04-22
Supplement: gnl-15-2-284-supple.pdf [file gnl-15-2-284-supple.pdf]

**Supplementary Table 1.** Adverse Events According to CTP Scores in the Sorafenib Group

| Adverse events                  | No. of all grades (no. of grade 3&4) |                       |                      |                      |
|---------------------------------|--------------------------------------|-----------------------|----------------------|----------------------|
|                                 | CTP score 5<br>(n=9)                 | CTP score 6<br>(n=15) | CTP score 7<br>(n=7) | CTP score 8<br>(n=4) |
| Hematologic                     |                                      |                       |                      |                      |
| Neutropenia                     | 1 (1)                                | 0 (0)                 | 0 (0)                | 0 (0)                |
| Anemia                          | 2 (0)                                | 2 (1)                 | 3 (0)                | 0 (0)                |
| Thrombocytopenia                | 0 (0)                                | 1 (1)                 | 2 (0)                | 0 (0)                |
| Dermatologic                    |                                      |                       |                      |                      |
| Hand-foot skin reaction         | 5 (2)                                | 3 (0)                 | 2 (1)                | 0 (0)                |
| Rash                            | 0 (0)                                | 1 (0)                 | 0 (0)                | 0 (0)                |
| Scrotal erythema                | 1 (0)                                | 0 (0)                 | 0 (0)                | 0 (0)                |
| Gastrointestinal                |                                      |                       |                      |                      |
| Dyspepsia/anorexia              | 0 (0)                                | 5 (1)                 | 3 (1)                | 1 (0)                |
| Nausea/vomiting                 | 1 (1)                                | 1 (0)                 | 3 (1)                | 2 (1)                |
| Diarrhea/constipation           | 3 (1)                                | 1 (0)                 | 0 (0)                | 2 (1)                |
| Abdominal pain                  | 1 (1)                                | 1 (0)                 | 0 (0)                | 1 (0)                |
| GI bleeding                     | 0 (0)                                | 1 (0)                 | 1 (1)                | 0 (0)                |
| HCC rupture                     | 0 (0)                                | 0 (0)                 | 1 (1)                | 1 (1)                |
| Constitutional                  |                                      |                       |                      |                      |
| Fatigue                         | 4 (2)                                | 3 (1)                 | 1 (1)                | 2 (1)                |
| General weakness                | 1 (0)                                | 0 (0)                 | 1 (0)                | 0 (0)                |
| Laboratory                      |                                      |                       |                      |                      |
| AST elevation                   | 1 (1)                                | 5 (2)                 | 1 (0)                | 1 (1)                |
| ALT elevation                   | 1 (0)                                | 1 (1)                 | 0 (0)                | 0 (0)                |
| Bilirubin elevation             | 1 (1)                                | 7 (4)                 | 2 (1)                | 3 (0)                |
| PT INR elevation                | 2 (0)                                | 5 (0)                 | 4 (0)                | 1 (0)                |
| Hyponatremia                    | 0 (0)                                | 0 (0)                 | 0 (0)                | 1 (1)                |
| Complication of liver cirrhosis |                                      |                       |                      |                      |
| Ascites aggravation             | 0 (0)                                | 0 (0)                 | 1 (1)                | 1 (1)                |
| SBP                             | 0 (0)                                | 0 (0)                 | 1 (1)                | 0 (0)                |
| Hepatic encephalopathy          | 0 (0)                                | 1 (1)                 | 1 (1)                | 0 (0)                |
| Catheter related complication   |                                      |                       |                      |                      |
| Catheter obstruction            | 0 (0)                                | 0 (0)                 | 0 (0)                | 0 (0)                |
| Chemoport site infection        | 0 (0)                                | 0 (0)                 | 0 (0)                | 0 (0)                |
| Hepatic artery total occlusion  | 0 (0)                                | 0 (0)                 | 0 (0)                | 0 (0)                |
| Others                          |                                      |                       |                      |                      |
| Infection                       | 0 (0)                                | 0 (0)                 | 0 (0)                | 0 (0)                |
| Febrile neutropenia             | 0 (0)                                | 0 (0)                 | 0 (0)                | 0 (0)                |
| Peripheral neuropathy           | 0 (0)                                | 0 (0)                 | 1 (0)                | 0 (0)                |
| Dizziness                       | 2 (0)                                | 0 (0)                 | 0 (0)                | 0 (0)                |

CTP, Child-Turcotte-Pugh; GI, gastrointestinal; HCC, hepatocellular carcinoma; AST, aspartate aminotransferase; ALT, alanine aminotransferase; PT, prothrombin time; INR, international normalized ratio; SBP, spontaneous bacterial peritonitis.

**Supplementary Table 2.** Adverse Events According to CTP Scores in the HAIC Group

| Adverse events                         | No. of all grades (no. of grade 3&4) |                       |                      |                      |                      |
|----------------------------------------|--------------------------------------|-----------------------|----------------------|----------------------|----------------------|
|                                        | CTP score 5<br>(n=11)                | CTP score 6<br>(n=16) | CTP score 7<br>(n=7) | CTP score 8<br>(n=3) | CTP score 9<br>(n=1) |
| <b>Hematologic</b>                     |                                      |                       |                      |                      |                      |
| Neutropenia                            | 2 (1)                                | 5 (2)                 | 1 (1)                | 1 (0)                | 0 (0)                |
| Anemia                                 | 4 (0)                                | 4 (2)                 | 4 (1)                | 1 (0)                | 1 (0)                |
| Thrombocytopenia                       | 5 (1)                                | 6 (4)                 | 3 (1)                | 2 (1)                | 1 (1)                |
| <b>Dermatologic</b>                    |                                      |                       |                      |                      |                      |
| Hand-foot skin reaction                | 0 (0)                                | 0 (0)                 | 0 (0)                | 0 (0)                | 0 (0)                |
| Rash                                   | 0 (0)                                | 0 (0)                 | 0 (0)                | 0 (0)                | 0 (0)                |
| Scrotal erythema                       | 0 (0)                                | 0 (0)                 | 0 (0)                | 0 (0)                | 0 (0)                |
| <b>Gastrointestinal</b>                |                                      |                       |                      |                      |                      |
| Dyspepsia/anorexia                     | 2 (1)                                | 2 (0)                 | 1 (0)                | 0 (0)                | 0 (0)                |
| Nausea/vomiting                        | 1 (0)                                | 1 (0)                 | 1 (0)                | 0 (0)                | 1 (1)                |
| Diarrhea/constipation                  | 0 (0)                                | 1 (0)                 | 1 (1)                | 0 (0)                | 0 (0)                |
| Abdominal pain                         | 0 (0)                                | 1 (0)                 | 1 (0)                | 0 (0)                | 0 (0)                |
| GI bleeding                            | 1 (1)                                | 0 (0)                 | 0 (0)                | 0 (0)                | 0 (0)                |
| HCC rupture                            | 0 (0)                                | 0 (0)                 | 0 (0)                | 1 (1)                | 0 (0)                |
| <b>Constitutional</b>                  |                                      |                       |                      |                      |                      |
| Fatigue                                | 1 (0)                                | 2 (0)                 | 0 (0)                | 0 (0)                | 0 (0)                |
| General weakness                       | 1 (1)                                | 2 (1)                 | 0 (0)                | 0 (0)                | 0 (0)                |
| <b>Laboratory</b>                      |                                      |                       |                      |                      |                      |
| AST elevation                          | 3 (1)                                | 0 (0)                 | 1 (1)                | 1 (0)                | 1 (1)                |
| ALT elevation                          | 3 (1)                                | 1 (0)                 | 0 (0)                | 1 (0)                | 0 (0)                |
| Bilirubin elevation                    | 0 (0)                                | 4 (0)                 | 1 (0)                | 1 (0)                | 0 (0)                |
| PT INR elevation                       | 3 (0)                                | 2 (0)                 | 0 (0)                | 1 (0)                | 0 (0)                |
| Hyponatremia                           | 0 (0)                                | 0 (0)                 | 0 (0)                | 0 (0)                | 0 (0)                |
| <b>Complication of liver cirrhosis</b> |                                      |                       |                      |                      |                      |
| Ascites aggravation                    | 0 (0)                                | 0 (0)                 | 0 (0)                | 0 (0)                | 0 (0)                |
| SBP                                    | 0 (0)                                | 0 (0)                 | 0 (0)                | 1 (1)                | 1 (1)                |
| Hepatic encephalopathy                 | 0 (0)                                | 0 (0)                 | 1 (1)                | 0 (0)                | 0 (0)                |
| <b>Catheter related complication</b>   |                                      |                       |                      |                      |                      |
| Catheter obstruction                   | 1 (0)                                | 0 (0)                 | 1 (1)                | 0 (0)                | 0 (0)                |
| Chemoport site infection               | 1 (1)                                | 1 (1)                 | 2 (1)                | 0 (0)                | 0 (0)                |
| Hepatic artery occlusion               | 1 (1)                                | 0 (0)                 | 0 (0)                | 0 (0)                | 0 (0)                |
| <b>Others</b>                          |                                      |                       |                      |                      |                      |
| Infection                              | 1 (1)                                | 2 (2)                 | 0 (0)                | 0 (0)                | 1 (1)                |
| Febrile neutropenia                    | 1 (1)                                | 0 (0)                 | 0 (0)                | 0 (0)                | 0 (0)                |
| Peripheral neuropathy                  | 0 (0)                                | 0 (0)                 | 1 (0)                | 0 (0)                | 0 (0)                |
| Dizziness                              | 0 (0)                                | 1 (0)                 | 0 (0)                | 0 (0)                | 0 (0)                |

CTP, Child-Turcotte-Pugh; HAIC, hepatic arterial infusion chemotherapy; GI, Gastrointestinal; HCC, hepatocellular carcinoma; AST, aspartate aminotransferase; ALT, alanine aminotransferase; PT, prothrombin time; INR, international normalized ratio; SBP, spontaneous bacterial peritonitis.
